# Supplementary material for: A heterostructured WO3–SnO2 nanocomposite for the efficient photocatalytic production of H2O2 under visible light
Source: Royal Society of Chemistry journal article supplement (doi:10.1039/d4ta01223b), 2024-01-01
Supplement: d4ta01223b1.pdf [file d4ta01223b1.pdf]

## Electronic Supplementary Information

# A heterostructured WO<sub>3</sub>-SnO<sub>2</sub> nanocomposite for efficient photocatalytic production of H<sub>2</sub>O<sub>2</sub> under visible light

Diya Xie<sup>a</sup>, Chen Chen<sup>a</sup>, Yaru Wang<sup>a</sup>, Cheng Sun<sup>a</sup>, Yiming Xu<sup>a,b,\*</sup> and Jianguo Huang<sup>a,\*</sup>

<sup>a</sup> *Department of Chemistry, Zhejiang University, Hangzhou 310058, PR China*

<sup>b</sup> *State Key Laboratory of Silicon Materials, Zhejiang University, Hangzhou 310027, P.R. China*

\*Corresponding author. E-mail address: jghuang@zju.edu.cn (J. Huang).

| <b>Contents</b>                                                                                                               | <b>pages</b> |
|-------------------------------------------------------------------------------------------------------------------------------|--------------|
| Fig. S1–S2. XRD and absorption spectra                                                                                        | S2           |
| Fig. S3–S5. Production of H <sub>2</sub> O <sub>2</sub> in different circumstance                                             | S3–4         |
| Fig. S6–S7. Current–voltage curves and curve fitting for oxygen reduction and water oxidation                                 | S4–5         |
| Fig. S8–S10. Current–voltage curves for oxygen reduction on rotating disk film electrode, Mott–Schottky plots and OCP fitting | S5–7         |
| Table S1. The binding energies and percentage of different O species for samples                                              | S7           |
| Table S2. Fitting data of TA kinetic curves                                                                                   | S8           |
| Table S3. Electrochemical test data for different samples                                                                     | S8           |

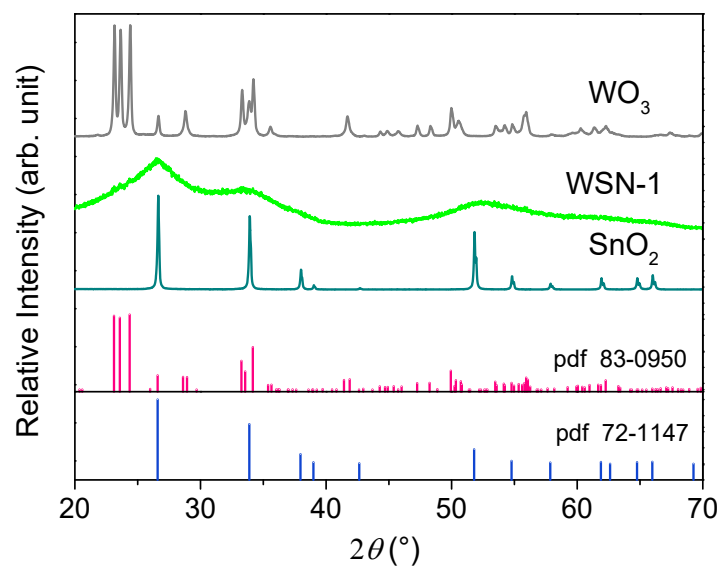

**Fig. S1** XRD patterns of WO<sub>3</sub>, WSN-1 and SnO<sub>2</sub>.

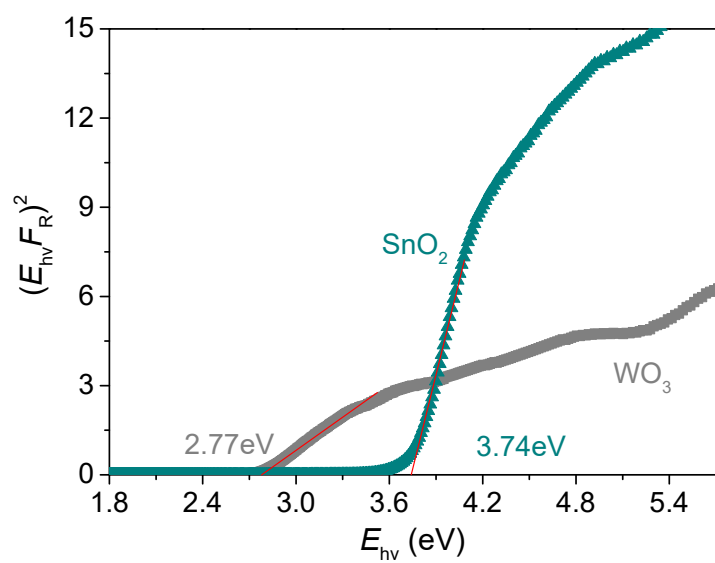

**Fig. S2** The direct band gap energy of WO<sub>3</sub> and SnO<sub>2</sub> from Tauc plot, where  $E_{hv}$  is light energy, and  $F_R$  is Kubella-Munk unit.

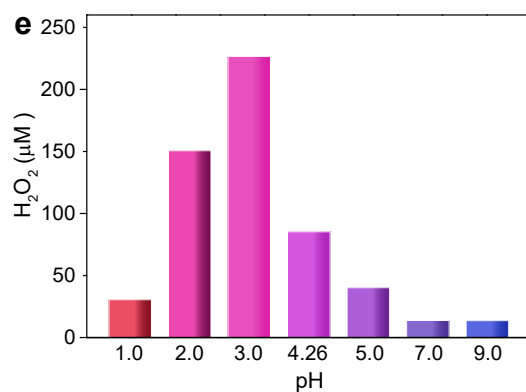

**Fig. S3** [H<sub>2</sub>O<sub>2</sub>] at 5h with different initial pHs (pH was adjusted by dropping 0.1 M HClO<sub>4</sub> solution before light illumination)

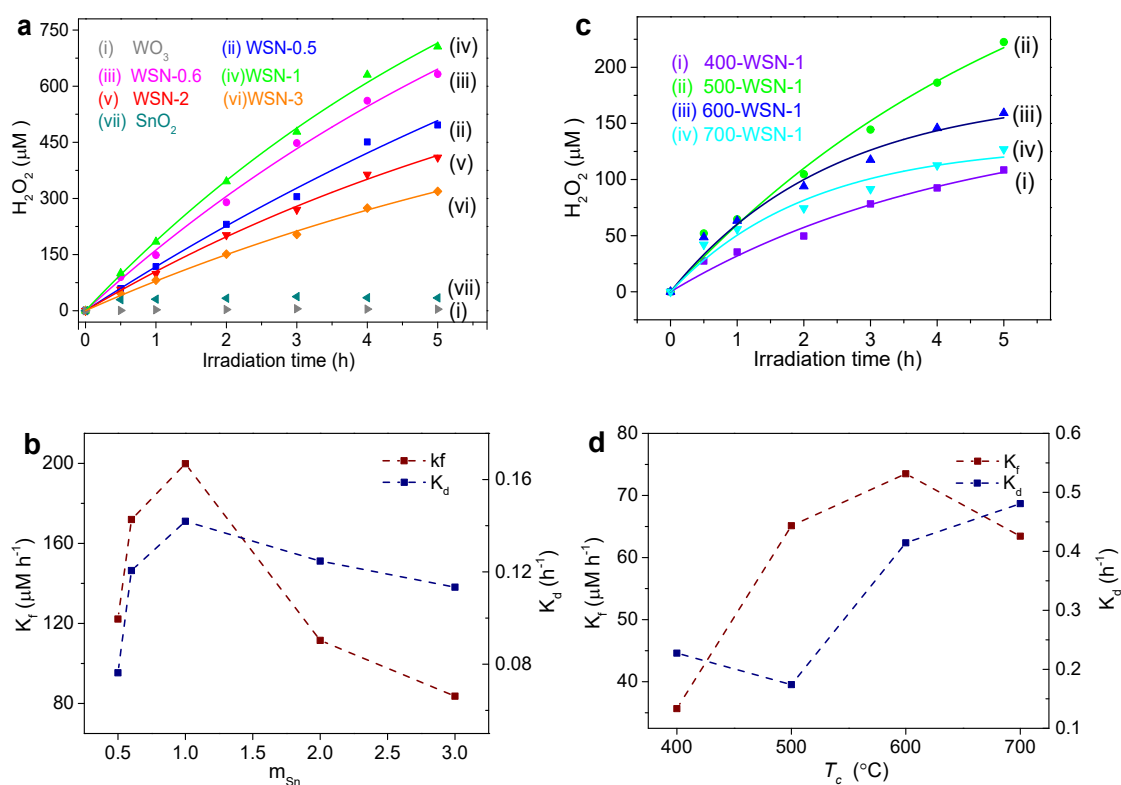

**Fig. S4** (a) Production of H<sub>2</sub>O<sub>2</sub> on (i) WO<sub>3</sub>, (ii) WSN-0.5, (iii) WSN-0.6, (iv) WSN-1, (v) WSN-2, (vi) WSN-3 and (vii) SnO<sub>2</sub> under UV light. (b) The corresponding formation ( $k_f$ ) and decomposition ( $k_d$ ) kinetic plots of WSN-*x*. (c) Production of H<sub>2</sub>O<sub>2</sub> on T<sub>c</sub>-WSN-1 under visible light, T<sub>c</sub> = (i) 400 °C, (ii) 500 °C, (iii) 600 °C and (iv) 700 °C. (d)  $k_f$  and  $k_d$  kinetic plots of T<sub>c</sub>-WSN-1.

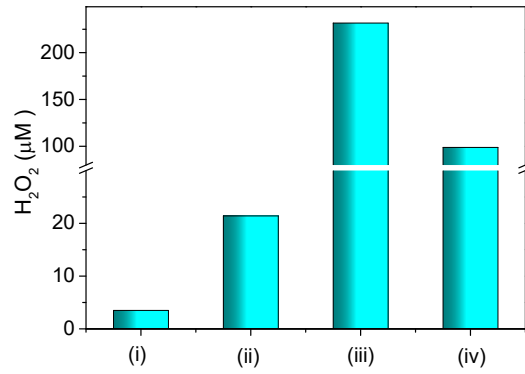

**Fig. S5** [H<sub>2</sub>O<sub>2</sub>] at 5h on WSN-1 (f) in presence of (i) no additive, (ii) 20% methanol, (iii) 20% ethanol, (iv) 20% isopropanol.

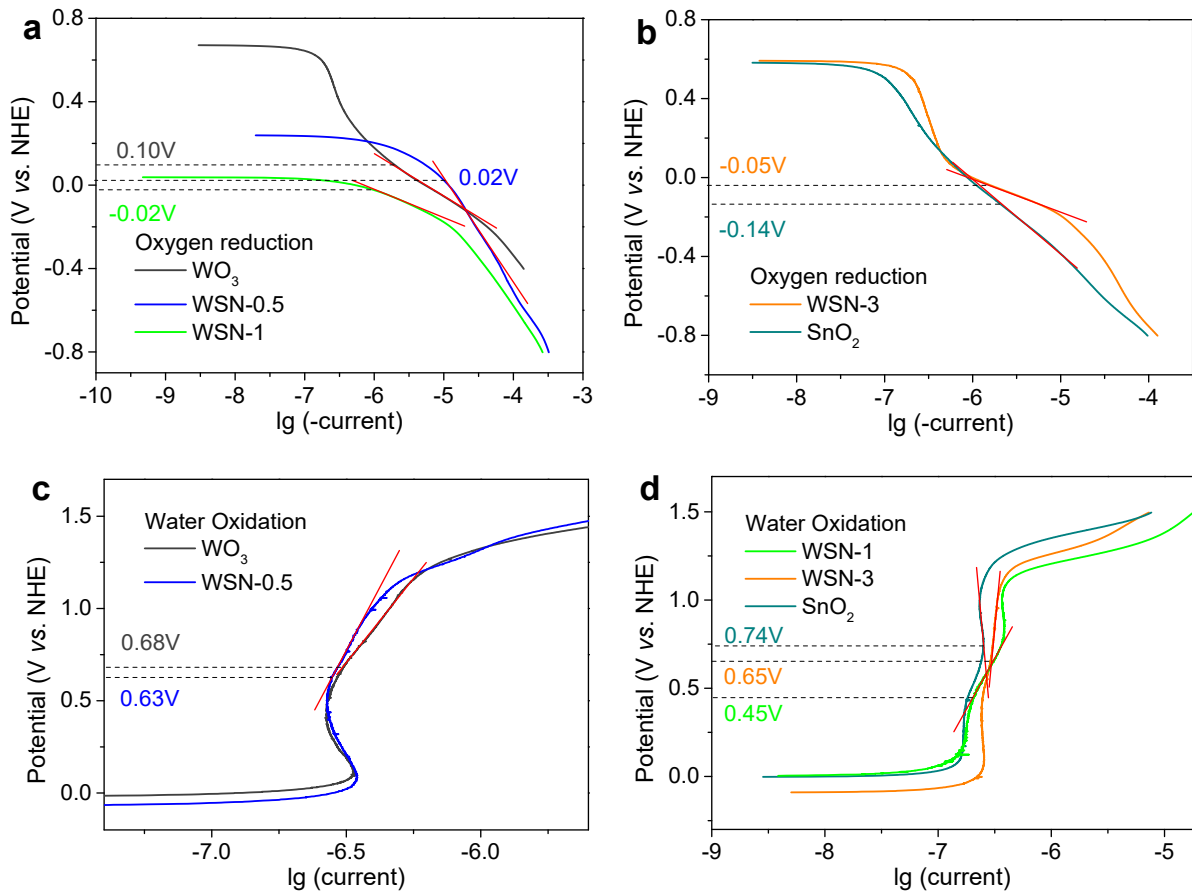

**Fig. S6** Curve fitting for the onset potentials of oxygen reduction (a,b) and water oxidation (c,d) in the dark of WO<sub>3</sub>, WSN-0.5, WSN-1, WSN-3 and SnO<sub>2</sub>.

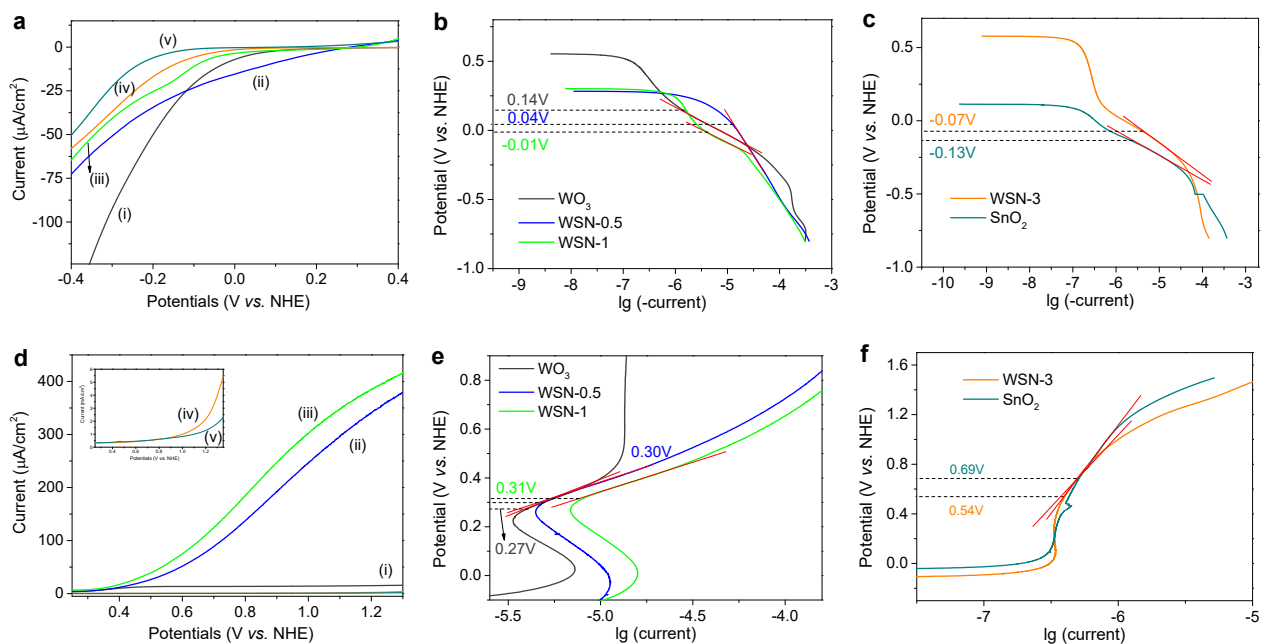

**Fig. S7** Light current–voltage curves (a,d) and curve fitting for the onset potentials of oxygen reduction (b,c) and water oxidation (e,f) of (i)  $\text{WO}_3$ , (ii) WSN-0.5, (iii) WSN-1, (iv) WSN-3 and (v)  $\text{SnO}_2$ , measured in 0.5 M  $\text{NaClO}_4$  under  $\text{O}_2$  and  $\text{N}_2$ , respectively.

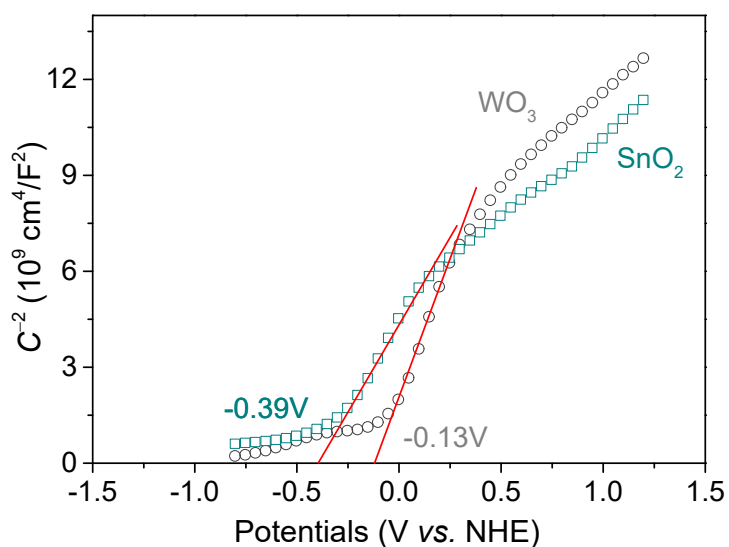

**Fig. S8** Mott–Schottky plots for film electrodes of  $\text{WO}_3$  and  $\text{SnO}_2$ , measured at 1 kHz in 0.5 M  $\text{NaClO}_4$  under  $\text{N}_2$ .

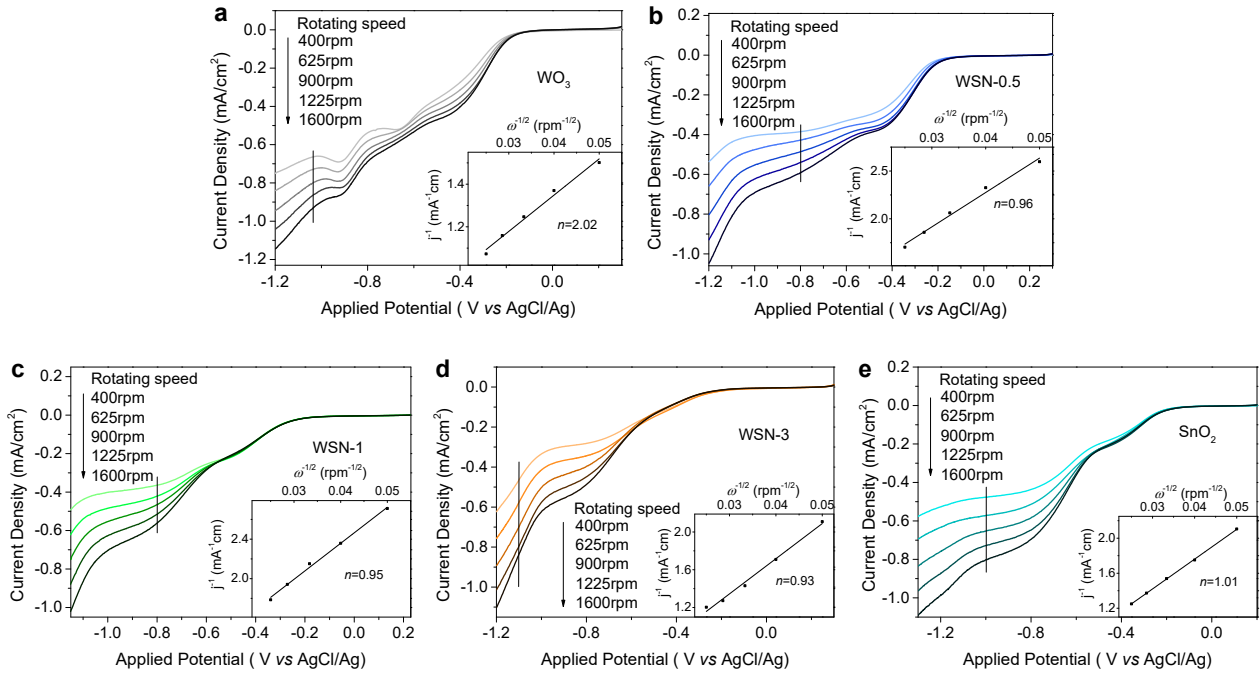

**Fig. S9** Dark oxygen reduction of (a) WO<sub>3</sub>, (b) WSN-0.5, (c) WSN-1, (d) WSN-3 and (e) SnO<sub>2</sub> on a rotating disk film electrode at different rotating speeds (ω), measured in 0.5 M NaClO<sub>4</sub>. The average number of electrons (n) for O<sub>2</sub> reduction was calculated from Koutecky-Levich equation,  $j^{-1} = j_k^{-1} + B^{-1} \omega^{-1/2}$ , and  $B = 0.2nF\nu^{-1/6}CD^{2/3}$ , where  $j$  is the current,  $j_k$  is the kinetic limited current,  $F$  is Faraday constant,  $\nu$  the is the kinetic viscosity of water (0.01 cm<sup>2</sup>/s),  $C$  is O<sub>2</sub> concentration (1.2 μM), and  $D$  is O<sub>2</sub> diffusion coeddicient (1.4×10<sup>-5</sup> cm<sup>2</sup>/s).

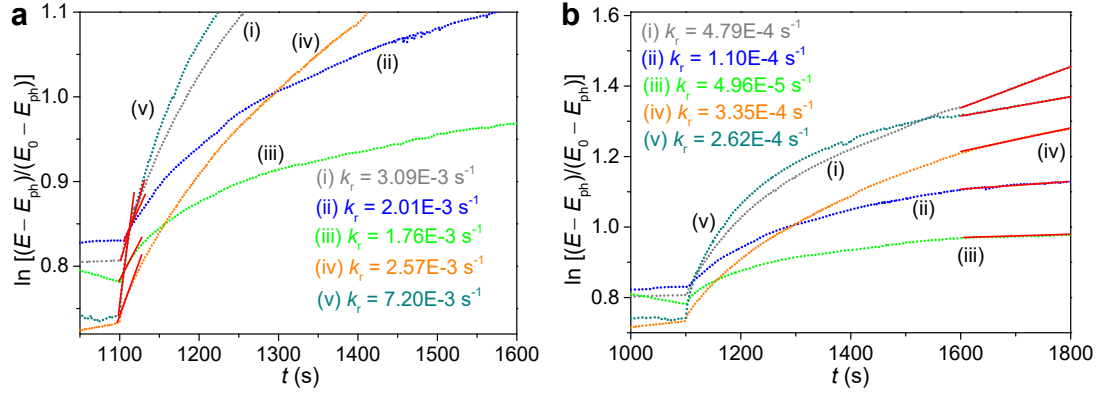

**Fig. S10** (a,b) Curve fitting for light off open circuit potentials (OCP) of (i)  $\text{WO}_3$ , (ii) WSN-0.5, (iii) WSN-1, (iv) WSN-3 and (v)  $\text{SnO}_2$ . Equation of  $(E - E_{\text{ph}})/(E_0 - E_{\text{ph}}) = 1 - \exp(-k_r t)$  is used, where  $E$  is OCP at time  $t$ ,  $E_0$  and  $E_{\text{ph}}$  are dark and light stationary OCP, respectively.  $k_r$  is the recombination rate constant (J. Kim, D. Monllor-Satoca, W. Choi, Simultaneous production of hydrogen with the degradation of organic pollutants using  $\text{TiO}_2$  photocatalyst modified with dual surface components, Energy Environ. Sci. 5 (2012) 7647–7656).

**Table S1.** The binding energies and percentage of different O species for WSN-x samples

| Samples        | W $4f_{7/2}$ | W $4f_{5/2}$ | Sn $3d_{5/2}$ | Sn $3d_{3/2}$ | $\text{O}_{\text{lat}}$ | $\text{O}_{\text{abs}}$ |
|----------------|--------------|--------------|---------------|---------------|-------------------------|-------------------------|
| $\text{WO}_3$  | 35.49        | 37.63        |               |               | 530.3 ( 86.7% )         | 531.3 ( 13.3% )         |
| $\text{SnO}_2$ |              |              | 486.78        | 495.21        | 530.7 ( 75.6% )         | 532.1 ( 24.4% )         |
| WSN-0.5        | 35.90        | 38.05        | 487.17        | 495.60        | 530.8 ( 71.6% )         | 531.8 ( 28.4% )         |
| WSN-0.6        | 35.99        | 38.13        | 487.20        | 495.62        | 530.9 ( 71.3% )         | 532.1 ( 28.7% )         |
| WSN-1          | 36.01        | 38.15        | 487.27        | 495.68        | 530.7 ( 70.9% )         | 531.9 ( 29.1% )         |
| WSN-2          | 36.16        | 38.31        | 487.35        | 495.74        | 531.1 ( 71.6% )         | 532.1 ( 28.4% )         |
| WSN-3          | 36.17        | 38.31        | 487.35        | 495.75        | 531.1 ( 72.7% )         | 532.4 ( 27.3% )         |

**Table S2.** Multi-exponential fitting data of TA kinetic curves for WO<sub>3</sub>, WSN-1 and SnO<sub>2</sub> samples

| Photocatalyst    | $\tau_1$ (ps) | $ A_1 $ | $\tau_2$ (ps) | $ A_2 $ | $\tau_3$ (ps) | $ A_3 $ | $\tau_{ave}$ (ps) |
|------------------|---------------|---------|---------------|---------|---------------|---------|-------------------|
| WO <sub>3</sub>  | 0.19          | 1.74E-1 | 1.76          | 9.28E-4 | 35.29         | 8.73E-4 | 0.38              |
| WSN-1            | 0.22          | 4.24E-3 | 4.26          | 1.79E-3 | 55.89         | 1.13E-3 | 10.03             |
| SnO <sub>2</sub> | 0.14          | 32.2    | 1.70          | 5.28E-4 | 37.21         | 1.58E-4 | 0.14              |

**Table S3.** Electrochemical test data for WO<sub>3</sub>, SnO<sub>2</sub> and WSN-*x* samples<sup>a</sup>

| Samples          | $E_{on}$ (V, NHE) |      | $E_{on}^b$ (V, NHE) |                   | $I$ (uA/cm <sup>2</sup> ) |      | $I^b$ (uA/cm <sup>2</sup> ) |                   |
|------------------|-------------------|------|---------------------|-------------------|---------------------------|------|-----------------------------|-------------------|
|                  | ORR               | WOR  | ORR                 | WOR               | ORR                       | WOR  | ORR                         | WOR               |
| WO <sub>3</sub>  | 0.10              | 0.68 | 0.14 <sup>b</sup>   | 0.27 <sup>b</sup> | 139.0                     | 0.88 | 149.0 <sup>b</sup>          | 15.8 <sup>b</sup> |
| WSN-0.5          | 0.02              | 0.63 | 0.04 <sup>b</sup>   | 0.30 <sup>b</sup> | 66.9                      | 0.93 | 72.8 <sup>b</sup>           | 379 <sup>b</sup>  |
| WSN-1            | -0.02             | 0.45 | 0.01 <sup>b</sup>   | 0.32 <sup>b</sup> | 41.5                      | 4.5  | 64.6 <sup>b</sup>           | 417 <sup>b</sup>  |
| WSN-3            | -0.05             | 0.65 | -0.07 <sup>b</sup>  | 0.54 <sup>b</sup> | 29.1                      | 1.67 | 58.0 <sup>b</sup>           | 4.0 <sup>b</sup>  |
| SnO <sub>2</sub> | -0.14             | 0.74 | -0.13 <sup>b</sup>  | 0.69 <sup>b</sup> | 10.8                      | 0.55 | 53.3 <sup>b</sup>           | 1.8 <sup>b</sup>  |

<sup>a</sup> ORR, oxygen reduction reaction; WOR, water oxidation reaction;  $E_{on}$ , the dark onset potential in 0.5 M NaClO<sub>4</sub>;  $I$ , the dark current for the ORR at -0.40 V (NHE), and for the WOR at 1.3 V (NHE). <sup>b</sup> Measured under light ( $\lambda > 420$  nm).
